# Supplementary material for: Simian Immunodeficiency Virus Infection of Chimpanzees (Pan troglodytes) Shares Features of Both Pathogenic and Non-pathogenic Lentiviral Infections
Source: PubMed Central journal article supplement (PMC4567047; doi:10.1371/journal.ppat.1005146), 2015-09-11

# Ch-No

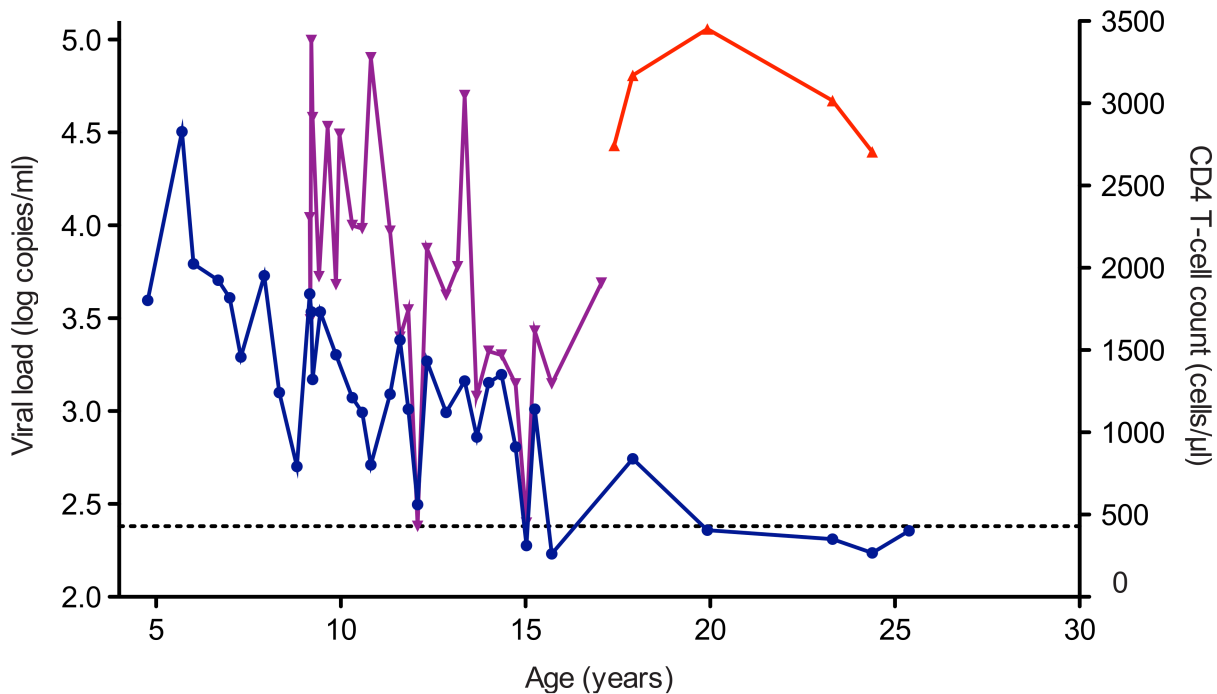

Supplement: ppat.1005146.s001.pdf [file ppat.1005146.s001.pdf]
