# Supplementary material for: Simian Immunodeficiency Virus Infection of Chimpanzees (Pan troglodytes) Shares Features of Both Pathogenic and Non-pathogenic Lentiviral Infections
Source: PLoS Pathog. 2015 Sep 11;11(9):e1005146. doi: 10.1371/journal.ppat.1005146 (PMC4567047; doi:10.1371/journal.ppat.1005146)
Supplement: S2 Table — (XLS) [file ppat.1005146.s008.xls]

## Sheet: Table S2
Variable modelled	Model (transformation)	Coefficients (CI 95%)
		Intercept			Age (years)			Gender (male)			HIV-1			SIVcpz
Absolute CD3+CD4+ count	General linear model (natural log)	1644	(1124, 2403)	***	-17.6747	(-45.8, -11)	NS	-144.936	(-491, +306)	NS	-269.906	(-623, +206)	NS	-838	(-1120, -405)	**
%CD3+CD4+ of lymphocytes	General linear model (none)	39.3886	(32.9, 45.9)	***	-0.1117	(-0.41, +0.2)	NS	2.4709	(-2.1, +7.1)	NS	-2.2202	(-7.4, +3.0)	NS	-12.9836	(-20.5, -5.4)	**
CD4:CD8 T-cell ratio	General linear model (none)	1.78489	(1.37, 2.19)	***	-0.021798	(-0.002, -0.04)	*	0.130191	(-0.16, +0.41)	NS	-0.039066	(-0.36, +2.84)	NS	-0.558907	(-1.03, -0.09)	*
